# Supplementary material for: Raf Kinase Inhibitory Protein regulates the cAMP-dependent protein kinase signaling pathway through a positive feedback loop
Source: PubMed Central journal article supplement — Proc Natl Acad Sci U S A. 2022 Jun 13;119(25):e2121867119. doi: 10.1073/pnas.2121867119 (PMC9231499; doi:10.1073/pnas.2121867119), 2022-06-13
Supplement: pnas.2121867119.sapp.pdf [file pnas.2121867119.sapp.pdf]

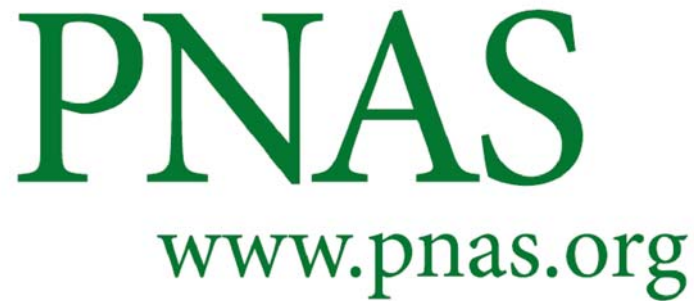

## Supplementary Information for

### **Raf Kinase Inhibitory Protein (RKIP) Regulates the cAMP-dependent Protein Kinase Signaling Pathway Through a Positive Feedback loop**

Jiyoung Lee<sup>1^#</sup>, Cristina Olivieri<sup>2#</sup>, Colin Ong<sup>1†</sup>, Larry R. Masterson<sup>2‡</sup>, Suzana Gomes<sup>1</sup>, Bok-Soon Lee<sup>4</sup>, Florian Schaeffer<sup>5</sup>, Kristina Lorenz<sup>5,6</sup>, Gianluigi Veglia<sup>2,3\*</sup>, and Marsha Rich Rosner<sup>1\*</sup>

Corresponding authors:

Marsha Rosner, Ben May Department for Cancer Research, University of Chicago, 959 East 57th Street, Chicago, IL 60614. Phone: (773) 702-0380; ORCID: 0000-0001-6586-8335. Email: [mrosner@uchicago.edu](mailto:mrosner@uchicago.edu)

Gianluigi Veglia Department of Biochemistry, Molecular Biology & Biophysics, University of Minnesota 321 Church Street SE, Minneapolis, MN 55455. Phone: (612) 625 0758, ORCID: 0000-0002-2795-6964. Email: [vegli001@umn.edu](mailto:vegli001@umn.edu)

### **This PDF file includes:**

Figures S1 to S7

Table S1

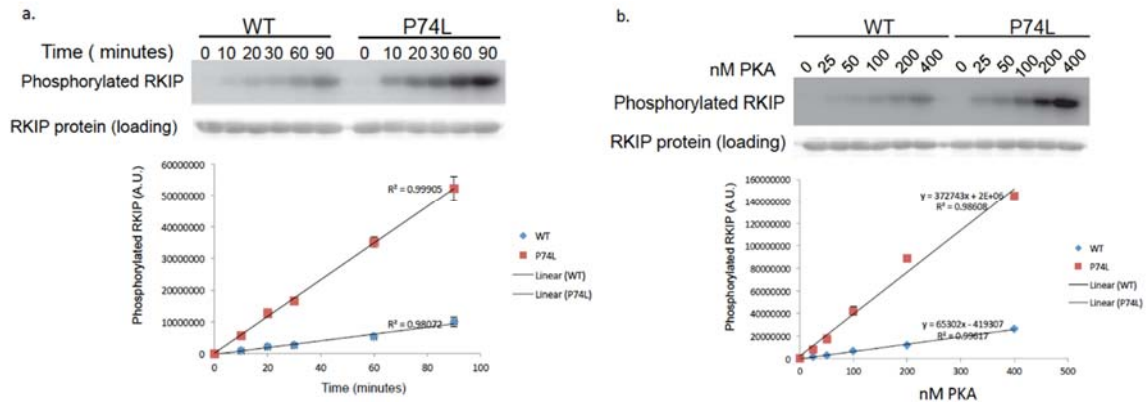

**Fig. S1. PKA phosphorylates WT and P74L RKIP in a time- and dose-dependent manner. (a) PKA phosphorylates RKIP substrates in a time-dependent manner.** Phosphorylation of RKIP<sup>WT</sup> and P74L mutant was assessed by in vitro kinase assay as a function of time for up to 90 minutes. The concentration of RKIP tested for each time point was 12  $\mu$ M. The reaction was visualized by phosphorimaging. Quantification of the reaction products was performed using ImageQuant 5.2 software and expressed as arbitrary units. Loading was monitored by probing the membranes with anti-RKIP antibody. (b) PKA phosphorylates RKIP substrates in a concentration-dependent manner. Phosphorylation of RKIP<sup>WT</sup> and P74L was determined with increasing concentrations of PKA and was quantitated as described. The error bars show the range of values measured from the two independent experiments.

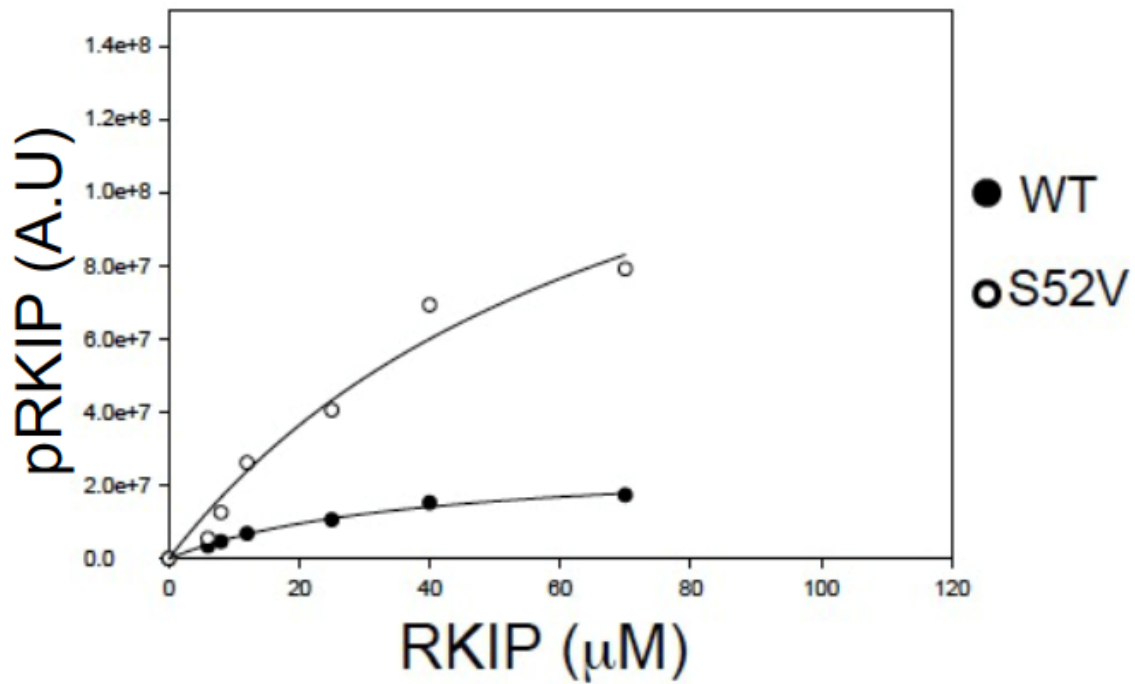

**Fig. S2. Plot of the rates of phosphorylation of wt or S52V RKIP versus RKIP concentration.** RKIP was assayed for PKA phosphorylation at different concentrations, and the rate of RKIP phosphorylation was determined. The phosphorylation levels were quantified using ImageQuant 5.2 software and were normalized to RKIP protein levels quantified by immunoblotting with anti-RKIP antibody and analyzed using Licor ImageStudio. To compare the phosphorylation between the various mutants, samples were normalized to the value for the WT RKIP protein. The fold induction shown in the bar graphs is an average of three independent experiments, and the error bars indicate the standard error of the mean (S.E.M).

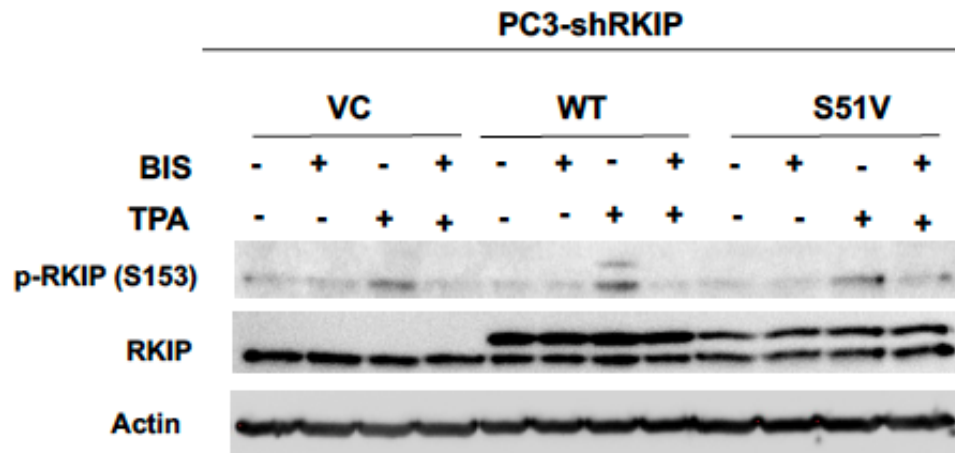

**Fig. S3. Phosphorylation at Serine 153 of WT RKIP and mutant S51V RKIP in prostate tumor cells by a selective PKC inhibitor.** PC-3 cells expressing RKIP<sup>WT</sup> or RKIP<sup>S51V</sup> were treated with 5  $\mu$ M of Bisindolylmaleimide (BIS) for 90 minutes followed by TPA treatment for 30 minutes. The phosphorylation levels of RKIP were visualized by immunoblotting with anti-phospho-S153-RKIP (p-RKIP) antibody.

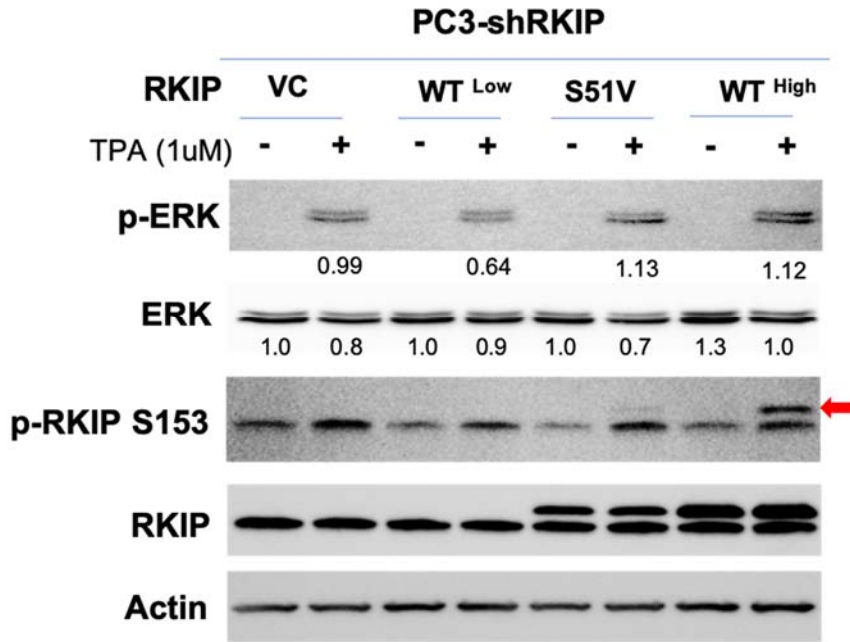

**Fig. S4. ERK activation is not affected by RKIP when TPA activates PKC in prostate tumor cells.** PC-3 cells expressing RKIP<sup>WT</sup> or RKIP<sup>S51V</sup> were treated with 1  $\mu$ M TPA for 30 minutes after 20 hours of serum starvation. The phosphorylation levels of ERK were visualized by immunoblotting with anti-phospho-ERK (p-ERK) antibody and quantified by band density using ImageJ software.

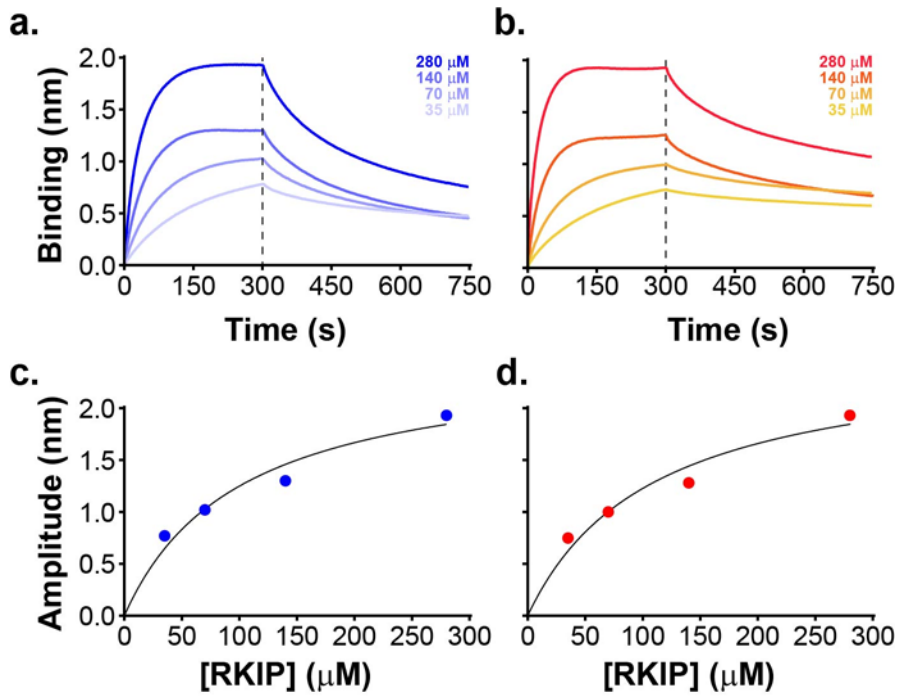

**Fig. S5. Kinetic analysis by bio-layer interferometry of the binding of RKIP to apo and ATP $\gamma$ N-saturated PKA-C.** (a and b) Sensograms of the His-tagged PKA-C apo (a) and ATP $\gamma$ N-bound (b) form. The enzyme was immobilized to an NTA biosensor and interactions were evaluated at different RKIP<sup>WT</sup> concentrations (35, 70, 140 and 280  $\mu$ M) as reported. (c and d) Binding amplitude plots for the interactions of RKIP with apo and ATP $\gamma$ N-bound PKA-C. The data points were fitted using a non-linear regression with 1:1 stoichiometry using GraphPad9®. The calculated binding constants and cooperativity coefficients are reported in **Table 2**. The points in the graph are reported as the average of three independent experiments.

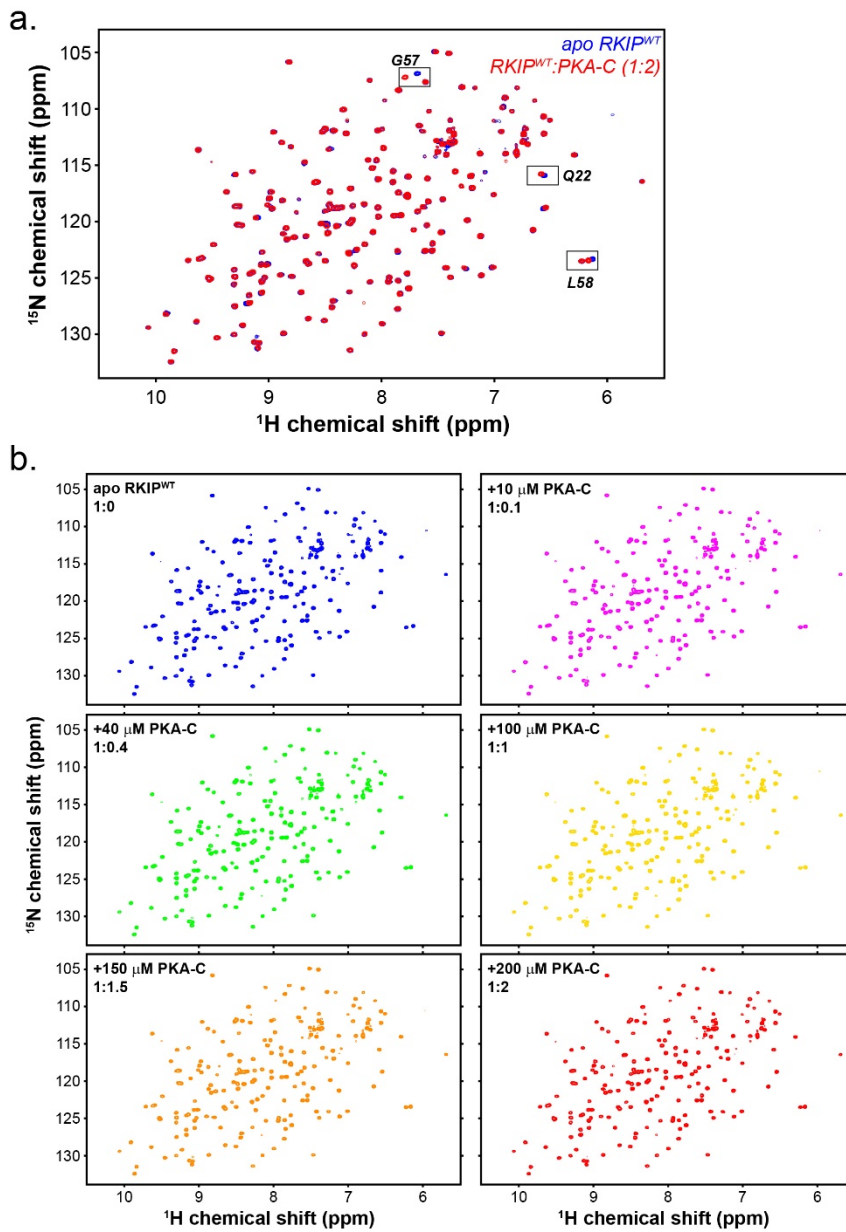

**Fig. S6. NMR titration of unlabeled PKA-C/ATP $\gamma$ N to  $^{15}$ N RKIP<sup>WT</sup>.** (a) [ $^1$ H, $^{15}$ N]-Heteronuclear single quantum correlation (HSQC) spectra of free RKIP<sup>WT</sup> and in complex with PKA-C/ATP $\gamma$ N (1:2 molar ratio). The two spectra were used to calculate the chemical shift perturbation (CSP) profile reported in figure 4c. The resonances in the boxes correspond to the residues in **figure 4a**. (b) Series of [ $^1$ H, $^{15}$ N]-HSQC spectra obtained by titrating increasing amount of unlabeled PKA-C/ATP $\gamma$ N to  $^{15}$ N RKIP<sup>WT</sup> (1:0, 1:0.1, 1:0.4, 1:1, 1:1.5, 1:2, RKIP:PKA-C molar ratio).

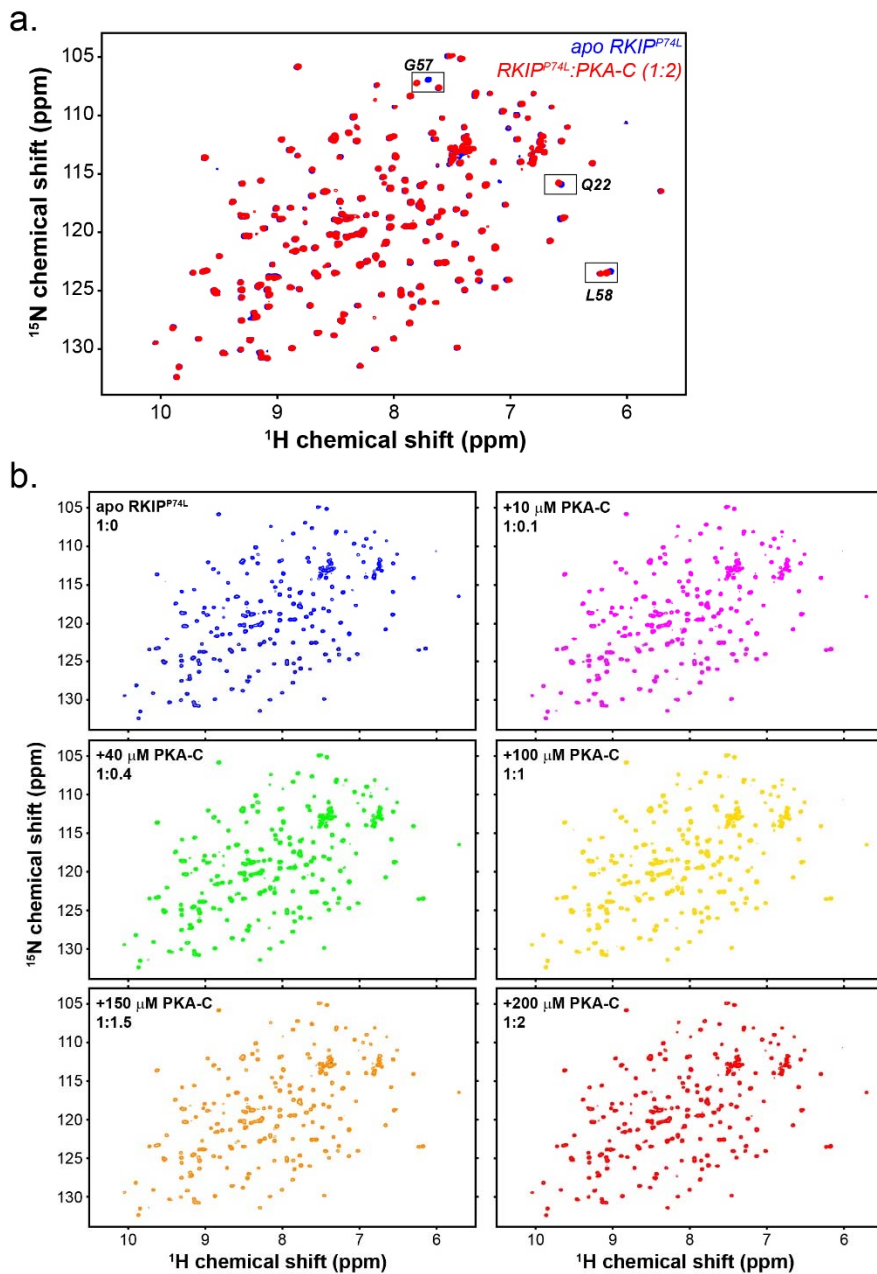

**Fig. S7. NMR titration of unlabeled PKA-C/ATP $\gamma$ N to  $^{15}$ N RKIP $^{P74L}$ .** (a) Overlay of [ $^1$ H,  $^{15}$ N]-HSQC spectra of free  $^{15}$ N P74L RKIP mutant and in complex with unlabeled PKA-C/ATP $\gamma$ N (1:2 molar ratio). The resonances in the small squares correspond to the residues in **figure 4b**. (b) Series of [ $^1$ H,  $^{15}$ N]-HSQC spectra obtained by titrating increasing amount of unlabeled PKA-C/ATP $\gamma$ N to  $^{15}$ N RKIP $^{P74L}$  (1:0, 1:0.1, 1:0.4, 1:1, 1:1.5, 1:2, RKIP:PKA-C molar ratio).



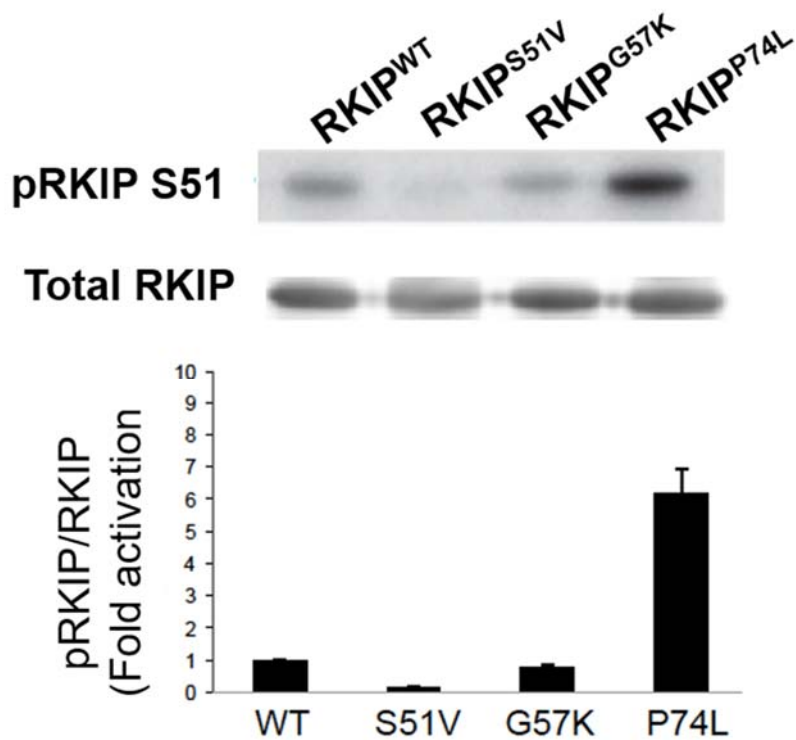

**Fig. S8. Mutation of RKIP residues perturbed by PKA binding alters phosphorylation of RKIP by PKA.** Phosphorylation of RKIP<sup>WT</sup> and mutant RKIP (S51V, G57K, and P74L) at S51. *In vitro* kinase assays were performed and RKIP phosphorylation levels were quantified using ImageQuant 5.2 software and these values were normalized to RKIP protein levels quantified by immunoblotting with anti-RKIP antibody and analyzed using Licor ImageStudio. To compare the phosphorylation between the various mutants, samples were normalized to the value for the RKIP<sup>WT</sup> protein. The fold induction shown in the bar graphs is an average of three independent experiments, and the error bars indicate the standard error of the mean (S.E.M).

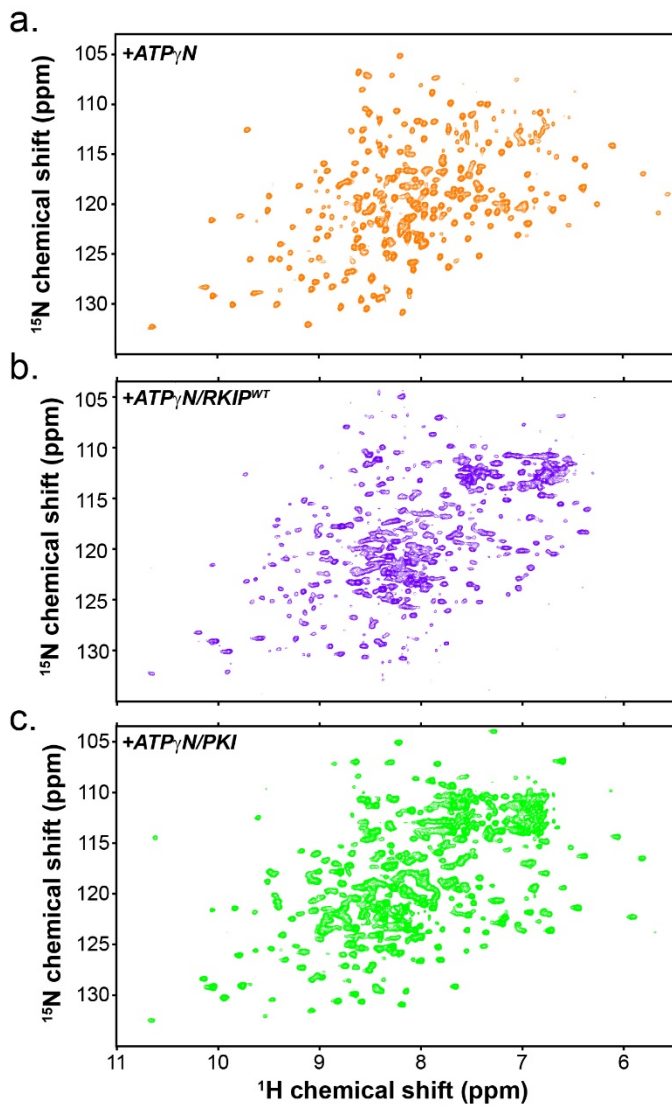

**Fig. S9.**  $^{15}\text{N}$ -TROSY spectra of PKA-C in the binary complex with ATP-analog and in the ternary complex with substrate or pseudosubstrate. (a)  $[^1\text{H}\text{-}^{15}\text{N}]$ -TROSY-HSQC spectrum of  $^{15}\text{N}$  PKA-C saturated with  $\text{ATP}_{\gamma}\text{N}$ . (b)  $[^1\text{H}\text{-}^{15}\text{N}]$ -TROSY-HSQC spectrum of PKA-C in complex with  $\text{ATP}_{\gamma}\text{N}$  and unlabeled-RKIP<sup>WT</sup> (1:1.2 molar ratio). (c)  $[^1\text{H}\text{-}^{15}\text{N}]$ -TROSY-HSQC spectrum of PKA-C/ $\text{ATP}_{\gamma}\text{N}$ /PKI complex (1:1.2 molar ratio). The chemical shift changes between the spectra in panel a and b and panel a and c are reported in the CSP profile in figure 6a in black and in blue, respectively. The spectra in panel a and b are adapted from Walker *et al.* (1).

**Table S1.** List of the backbone amide resonances of PKA-C/ATP $\gamma$ N complex that disappear upon the addition of RKIP<sup>WT</sup>.

| Residues that disappear in the ternary complex | Residue that are stabilized by in the ternary complex |
|------------------------------------------------|-------------------------------------------------------|
| E31                                            | F43                                                   |
| A34                                            | K47                                                   |
| L49                                            | R133                                                  |
| K63                                            | I174                                                  |
| K72                                            | I303                                                  |
| Y146                                           | Y330                                                  |
| D161                                           |                                                       |
| R165                                           |                                                       |
| D166                                           |                                                       |
| A188                                           |                                                       |
| W196                                           |                                                       |
| L198                                           |                                                       |
| A206                                           |                                                       |
| I209                                           |                                                       |
| I210                                           |                                                       |
| I244                                           |                                                       |
| Q245                                           |                                                       |
| I246                                           |                                                       |
| I250                                           |                                                       |
| F314                                           |                                                       |
| K343                                           |                                                       |
| G344                                           |                                                       |
| E346                                           |                                                       |

## SI References

Sample References:

1. C. Walker *et al.*, Cushing's syndrome driver mutation disrupts protein kinase A allosteric network, altering both regulation and substrate specificity. *Sci Adv* **5**, eaaw9298 (2019).
